# Supplementary material for: Expression Analysis of Autophagy Related Markers LC3B, p62 and HMGB1 Indicate an Autophagy-Independent Negative Prognostic Impact of High p62 Expression in Pulmonary Squamous Cell Carcinomas
Source: PubMed Central journal article supplement (PMC6162479; doi:10.3390/cancers10090281), 2018-08-21

## Supplementary Materials: Expression Analysis of Autophagy Related Markers LC3B, p62 and HMGB1 Indicate an Autophagy-Independent Negative Prognostic Impact of High p62 Expression in Pulmonary Squamous Cell Carcinomas

Rupert Langer, Christina Neppl, Manuel Keller, Ralph A. Schmid, Mario P. Tschan and Sabina Berezowska.

**Table S1.** LC3B Expression and clinico-pathologic parameters.

| Parameter             |           | LC3B |      | Total | p-Value |
|-----------------------|-----------|------|------|-------|---------|
|                       |           | Low  | High |       |         |
| gender                | Male      | 104  | 121  | 225   | 0.627   |
|                       | Female    | 19   | 27   | 46    |         |
| Age<br>(median)       | ≤69       | 64   | 74   | 138   | 0.807   |
|                       | >69       | 59   | 74   | 133   |         |
| pT-category           | pT1a      | 1    | 3    | 4     | 0.839   |
|                       | pT1b      | 7    | 12   | 19    |         |
|                       | pT1c      | 17   | 16   | 33    |         |
|                       | pT2a      | 23   | 31   | 54    |         |
|                       | pT2b      | 16   | 23   | 39    |         |
|                       | pT3       | 30   | 34   | 64    |         |
|                       | pT4       | 29   | 29   | 58    |         |
| pN-category           | pN0       | 61   | 76   | 137   | 0.225   |
|                       | pN1       | 42   | 58   | 100   |         |
|                       | pN2       | 20   | 14   | 34    |         |
| Distant<br>metastases | M0        | 120  | 146  | 266   | 0.662   |
|                       | M1        | 3    | 2    | 5     |         |
| Grading               | Grade 1/2 | 55   | 87   | 142   | 0.028   |
|                       | Grade 3   | 68   | 61   | 129   |         |
| total                 |           | 123  | 148  | 271   |         |

**Table S2.** p62 dot-like/cytoplasmic expression and clinico-pathologic parameters.

| Parameter          |           | p62 Dot-Like/Cytoplasmic |      | Total | p-Value |
|--------------------|-----------|--------------------------|------|-------|---------|
|                    |           | Low                      | High |       |         |
| gender             | Male      | 97                       | 128  | 225   | 0.139   |
|                    | Female    | 14                       | 32   | 46    |         |
| Age (median)       | ≤69       | 61                       | 77   | 138   | 0.323   |
|                    | >69       | 50                       | 83   | 133   |         |
| pT-category        | pT1a      | 1                        | 3    | 4     | 0.236   |
|                    | pT1b      | 10                       | 9    | 19    |         |
|                    | pT1c      | 17                       | 16   | 33    |         |
|                    | pT2a      | 23                       | 31   | 54    |         |
|                    | pT2b      | 12                       | 27   | 39    |         |
|                    | pT3       | 30                       | 34   | 64    |         |
|                    | pT4       | 18                       | 40   | 58    |         |
| pN-category        | pN0       | 60                       | 77   | 137   | 0.294   |
|                    | pN1       | 35                       | 65   | 100   |         |
|                    | pN2       | 16                       | 18   | 34    |         |
| Distant metastases | M0        | 109                      | 157  | 266   | 1.000   |
|                    | M1        | 2                        | 3    | 5     |         |
| Grading            | Grade 1/2 | 65                       | 77   | 142   | 0.108   |
|                    | Grade 3   | 46                       | 83   | 129   |         |
| total              |           | 160                      | 271  | 160   |         |

**Table S3.** p62 nuclear expression and clinico-pathologic parameters.

| Parameter          |          | p62 Nuclear |      | Total | p-Value |
|--------------------|----------|-------------|------|-------|---------|
|                    |          | Low         | High |       |         |
| gender             | Male     | 131         | 94   | 225   | 0.871   |
|                    | Female   | 26          | 20   | 46    |         |
| Age (median)       | ≤69      | 61          | 77   | 138   | 0.323   |
|                    | >69      | 50          | 83   | 133   |         |
| pT-category        | pT1a     | 3           | 1    | 4     | 0.576   |
|                    | pT1b     | 12          | 7    | 19    |         |
|                    | pT1c     | 21          | 12   | 33    |         |
|                    | pT2a     | 25          | 29   | 54    |         |
|                    | pT2b     | 25          | 14   | 39    |         |
|                    | pT3      | 37          | 27   | 64    |         |
|                    | pT4      | 34          | 24   | 58    |         |
| pN-category        | pN0      | 79          | 58   | 137   | 0.992   |
|                    | pN1      | 58          | 42   | 100   |         |
|                    | pN2      | 20          | 14   | 34    |         |
| Distant metastases | M0       | 153         | 113  | 266   | 0.402   |
|                    | M1       | 4           | 1    | 5     |         |
| Grading            | Grade1/2 | 68          | 74   | 139   | >0.001  |
|                    | Grade 3  | 89          | 40   | 129   |         |
| total              |          | 157         | 114  | 271   |         |

**Table S4.** HMGB1 expression and clinico-pathologic parameters.

| Parameter          | HMGB1     |      | Total | p-Value |
|--------------------|-----------|------|-------|---------|
|                    | Low       | High |       |         |
| gender             | Male      | 122  | 103   | 0.106   |
|                    | Female    | 31   | 15    |         |
| Age (median)       | ≤69       | 75   | 63    | 0.268   |
|                    | >69       | 82   | 51    |         |
| pT-category        | pT1a      | 0    | 4     | 0.126   |
|                    | pT1b      | 13   | 6     |         |
|                    | pT1c      | 19   | 14    |         |
|                    | pT2a      | 34   | 20    |         |
|                    | pT2b      | 24   | 15    |         |
|                    | pT3       | 36   | 28    |         |
|                    | pT4       | 27   | 31    |         |
|                    | pT4       | 27   | 31    |         |
| pN-category        | pN0       | 78   | 59    | 0.987   |
|                    | pN1       | 56   | 44    |         |
|                    | pN2       | 19   | 15    |         |
| Distant metastases | M0        | 151  | 115   | 0.656   |
|                    | M1        | 2    | 3     |         |
| Grading            | Grade 1/2 | 85   | 57    | 0.270   |
|                    | Grade 3   | 68   | 61    |         |
| total              |           | 153  | 118   |         |

**Table S5.** Combination LC3B and p62 and clinico-pathologic parameters.

| Parameter          | LC3B/p62  |    |    |    | Total | p-Value |
|--------------------|-----------|----|----|----|-------|---------|
|                    | LL        | LH | HL | HH |       |         |
| gender             | Male      | 53 | 51 | 44 | 77    | 0.380   |
|                    | Female    | 6  | 13 | 8  | 19    |         |
| Age (median)       | ≤69       | 30 | 34 | 31 | 43    | 0.370   |
|                    | >69       | 29 | 30 | 21 | 53    |         |
| pT-category        | pT1a      | 0  | 1  | 1  | 2     | 0.447   |
|                    | pT1b      | 3  | 4  | 7  | 5     |         |
|                    | pT1c      | 11 | 6  | 6  | 10    |         |
|                    | pT2a      | 12 | 11 | 11 | 20    |         |
|                    | pT2b      | 7  | 9  | 5  | 18    |         |
|                    | pT3       | 18 | 12 | 12 | 22    |         |
|                    | pT4       | 8  | 21 | 10 | 19    |         |
|                    | pT4       | 8  | 21 | 10 | 19    |         |
| pN-category        | pN0       | 33 | 28 | 27 | 49    | 0.344   |
|                    | pN1       | 15 | 27 | 20 | 38    |         |
|                    | pN2       | 11 | 9  | 5  | 9     |         |
| Distant metastases | M0        | 58 | 62 | 51 | 95    | 0.818   |
|                    | M1        | 1  | 2  | 1  | 1     |         |
| Grading            | Grade 1/2 | 31 | 24 | 34 | 53    | 0.023   |
|                    | Grade 3   | 28 | 40 | 18 | 43    |         |
| total              |           | 59 | 64 | 52 | 96    |         |

Figure S1. Survival curves of raw values of the immunohistochemical stainings.

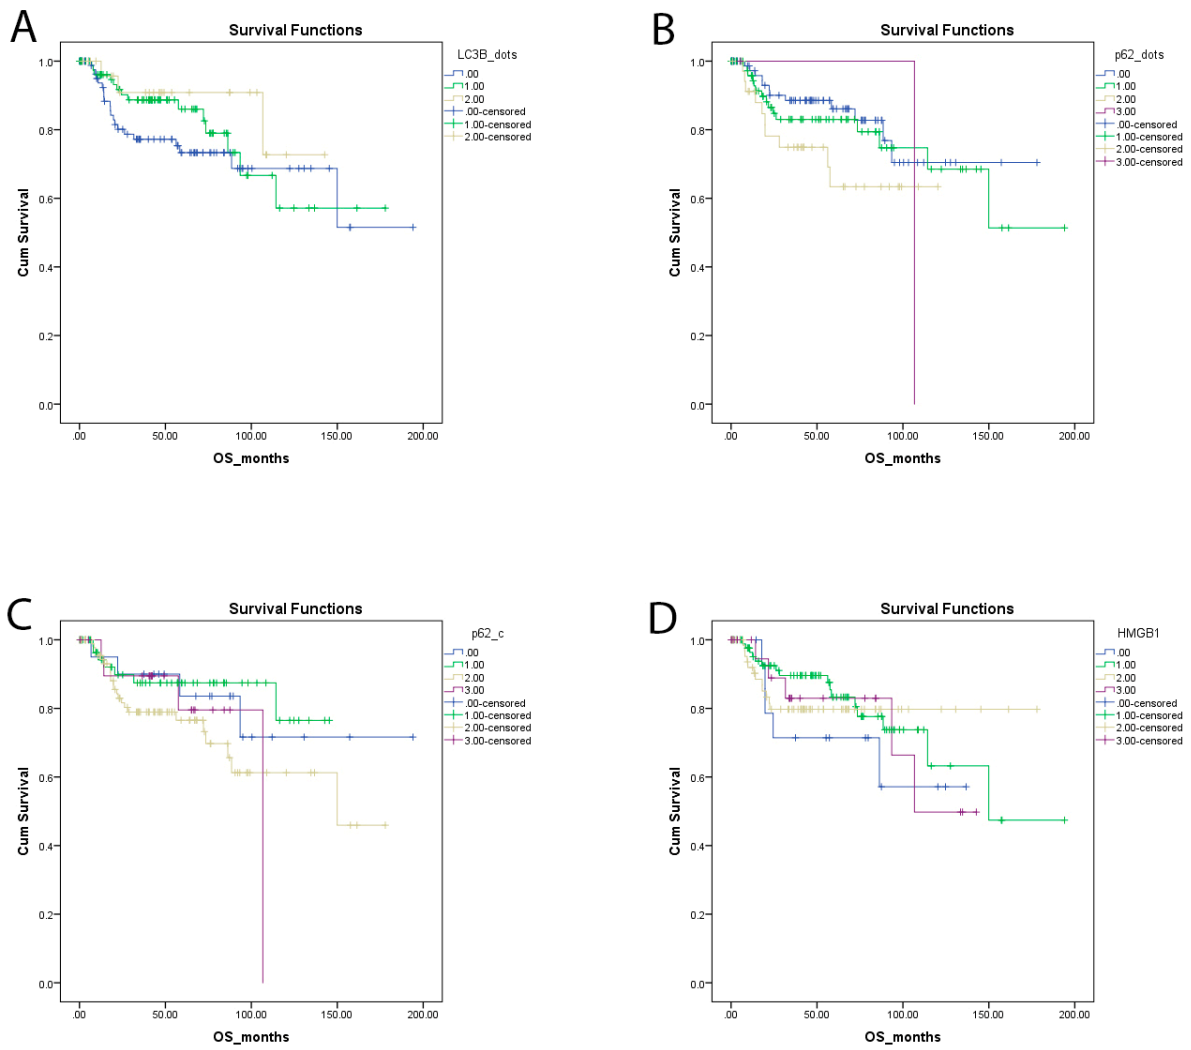

Supplement: cancers-10-00281-s001.pdf [file cancers-10-00281-s001.pdf]
